# Supplementary material
Source: publisher figshare collection journal article supplement (https://sage.figshare.com/ndownloader/files/15449792)
Supplement: Supplementary file 1 [file 15449792]

### Supplemental Table 3. Characteristics of Studies included in Systematic Review (n=40).

PC: Palliative care, PCU: Palliative Care Unit, PCI: pre-existing cognitive impairment. DSM: Diagnostic and Statistical Manual of Mental Disorders, DRS: Delirium Rating Scale, CAM: Confusion Assessment Method, CRS: Confusion Rating Scale, MDAS: Memorial Delirium Assessment Scale, DOSS: Delirium Observation Screening Scale, BCS: Bedside Confusion Scale, Nu-DESC: Nursing Delirium Screening Scale, ICD: International Classification of Diseases. PointP: point prevalence, PeriodP: period prevalence, Inc: cumulative incidence, LOS: length of stay, d: days, NR: not reported

| Reference                              | Country   | Study Design                         | Sample Size                                        | Care Setting &<br>Care Team Assessing<br>Delirium                                  | Palliative Indicator<br>Diagnosis                                                 | Diagnostic Tool<br>(score)        | Epidemiological Data Reported<br>(assessment period)                                                                            |
|----------------------------------------|-----------|--------------------------------------|----------------------------------------------------|------------------------------------------------------------------------------------|-----------------------------------------------------------------------------------|-----------------------------------|---------------------------------------------------------------------------------------------------------------------------------|
| Şenel, 2017 <sup>71</sup>              | Turkey    | Prospective Cohort                   | 213                                                | Inpatient PCU – Inpatient PC                                                       | ≥ 90% cancer, excluded PCI                                                        | DSM IV-TR, DRS<br>(score ≥11)     | PointP = 32% on admission, PeriodP = 49.8% entire admission (8.6+/-6.9 days)                                                    |
| Rainsford, 2014 <sup>61</sup>          | Australia | Cross Sectional                      | 51                                                 | Inpatient Hospice - Inpatient PC                                                   | ≥ 90% cancer, excluded PCI                                                        | CAM, DRS-R98 (score ≥13)          | PointP = 39.2% on admission                                                                                                     |
| Gagnon, 2000 <sup>43</sup>             | Canada    | Prospective Cohort                   | 89                                                 | Inpatient Hospice - Inpatient PC                                                   | ≥ 90% cancer, PCI included                                                        | DSM III-R, CAM, CRS<br>(score ≥2) | Inc = 32.8% (median LOS 19d), Incidence rate 25.4/1000 person days, PointP = 13.3% on admission, PeriodP = 62% (median LOS 12d) |
| Gagnon, 2012 <sup>55</sup>             | Canada    | Prospective Cohort                   | 1516                                               | Hospital Inpatients, Inpatient Hospice - Inpatient PC                              | ≥ 90% cancer, PCI included                                                        | CAM, CRS (score ≥2)               | Inc = 46.2% (mean LOS 19-22d), PointP = 20.2% on admission                                                                      |
| de la Cruz, Noguera 2015 <sup>31</sup> | USA       | Retrospective Cohort                 | 78                                                 | Community Home Hospice – Home Hospice                                              | ≥ 90% cancer, PCI unknown                                                         | MDAS (score ≥7)                   | PeriodP = 44% last 7 days of life                                                                                               |
| Detroyer, 2014 <sup>69</sup>           | Belgium   | Prospective Cohort                   | 48                                                 | Inpatient PCU - Inpatient PC                                                       | Mixed diagnoses, PCI included                                                     | CAM, DOSS (score ≥3)              | PeriodP = 29.9% first 10d of admission                                                                                          |
| Hui, 2012 <sup>32</sup>                | USA       | Prospective Cohort                   | 151                                                | Inpatient PCU in Cancer Center - Inpatient PC                                      | ≥ 90% cancer, PCI included                                                        | DSM IV-TR                         | PointP = 60.3%                                                                                                                  |
| Rao, 2011 <sup>33</sup>                | USA       | Prospective Cohort                   | 22                                                 | Inpatient Hospice - Inpatient PC                                                   | Mixed diagnoses, PCI included                                                     | CAM                               | PeriodP = 64% (mean LOS 15.5-18.9 d)                                                                                            |
| Spiller, 2006 <sup>57</sup>            | UK        | Prospective Cohort & Cross Sectional | 100 inpatient hospice, 109 in 8 inpatient settings | Inpatient Hospice, Inpatient PCU, General Inpatients - Inpatient PC, Consultant PC | ≥ 90% cancer in inpatient hospice, other demographics not specified, PCI included | CAM                               | Inc = 7% (7d) Cumulative incidence 0.07 (7d), PointP = 29% on admission to PCU, PointP = 29% in mixed PCU and inpatient         |
| Harrison, 2016 <sup>34</sup>           | USA       | Prospective Cohort                   | 100                                                | Inpatient Hospice - Inpatient PC                                                   | Demographic data not specified, PCI unknown                                       | CAM                               | PeriodP = 36% (8 weeks)                                                                                                         |
| Hosie, 2016 <sup>62</sup>              | Australia | Cross Sectional                      | 47                                                 | Inpatient PCU - Inpatient PC                                                       | Most patients >65yo, ≥ 90% cancer, PCI included                                   | DSM V                             | PointP = 19%                                                                                                                    |
| Sarhill, 2001 <sup>35</sup>            | USA       | Cross Sectional                      | 41                                                 | Inpatient PCU in Cancer Center - Inpatient PC                                      | ≥ 90% cancer, PCI included                                                        | BCS (score ≥2)                    | PointP = 32% on admission                                                                                                       |
| Morita, 2005 <sup>58</sup>             | Japan     | Prospective Cohort                   | 98 inpatients, 13 outpatients, 100 inpatient PCU   | General Inpatients, Outpatients, Inpatient PCU - Inpatient PC, Consultant PC       | ≥ 90% cancer, PCI unknown                                                         | DSM IV                            | PeriodP = 33% (first 7d of consult), PeriodP = 14% (first 7d of PCU admission)                                                  |

| <u>Reference</u>                        | <u>Country</u> | <u>Study Design</u>  | <u>Sample Size</u>                                            | <u>Care Setting &amp;<br/>Care Team Assessing<br/>Delirium</u>                           | <u>Palliative Indicator<br/>Diagnosis</u>              | <u>Diagnostic Tool<br/>(<i>diagnostic<br/>score</i>)</u>  | <u>Epidemiological Data Reported<br/>(assessment period)</u>                                            |
|-----------------------------------------|----------------|----------------------|---------------------------------------------------------------|------------------------------------------------------------------------------------------|--------------------------------------------------------|-----------------------------------------------------------|---------------------------------------------------------------------------------------------------------|
| Porteous, 2016 <sup>55</sup>            | UK             | Prospective Cohort   | 298                                                           | <b>Inpatient Hospice - Inpatient PC</b>                                                  | Age/diagnosis not specified, PCI included              | CAM                                                       | Inc = 9% (LOS 1-82d),<br>PointP = 11% on admission,<br>PeriodP = 19.1% (median LOS 9d)                  |
| Fainsinger, 2000 <sup>45</sup>          | Canada         | Prospective Cohort   | 50 inpatient hospice, 50 inpatient PCU, 50 general inpatients | <b>Inpatient PCU, General Inpatient, Inpatient Hospice - Inpatient PC, Consultant PC</b> | ≥ 90% cancer, PCI unknown                              | DSM IV                                                    | PeriodP = 88% (prior to death in PCU), 78% (prior to death in inpatient), 77% prior to death in hospice |
| de la Cruz, Fan, 2015 <sup>36</sup>     | USA            | Cross Sectional      | 771                                                           | <b>Cancer Center Inpatient – PC Consults</b>                                             | ≥ 90% cancer, PCI unknown                              | DSM IV-TR, MDAS ( <i>score</i> ≥7)                        | PointP = 33% at first assessment                                                                        |
| de La Cruz, Ransing, 2015 <sup>37</sup> | USA            | Retrospective Cohort | 556                                                           | <b>Inpatient PCU in Cancer Center - Inpatient PC</b>                                     | ≥ 90% cancer, PCI unknown                              | DSM IV-TR, MDAS ( <i>score</i> ≥7)                        | Inc = 29% (median LOS 5-6d),<br>PointP = 41% on admission,<br>PeriodP = 58% (median LOS 5-6d)           |
| Plaschke, 2016 <sup>67</sup>            | Germany        | Prospective Cohort   | 100                                                           | <b>Inpatient PCU - Inpatient PC</b>                                                      | ≥ 90% cancer, PCI unknown                              | Nu-DESC ( <i>score not reported</i> )                     | PeriodP = 29% (mean LOS 12-13d)                                                                         |
| Barnes, 2010 <sup>56</sup>              | UK             | Cross Sectional      | 59                                                            | <b>General Inpatient – Consultant PC</b>                                                 | Mixed diagnoses, age/gender not specified, PCI unknown | CAM                                                       | PointP = 8.5% at first assessment                                                                       |
| Mercadante, Masedu, 2017 <sup>51</sup>  | Italy          | Prospective Cohort   | 263                                                           | <b>Inpatient Hospice and Community Home Hospice - Inpatient PC, Community PC</b>         | ≥ 90% cancer, PCI unknown                              | MDAS ( <i>score</i> ≥7)                                   | PointP = 41.8% on admission, PointP 68% at 7d                                                           |
| Mercadante, Adile, 2017 <sup>52</sup>   | Italy          | Prospective Cohort   | 292                                                           | <b>Inpatient PCU in Cancer Center - Inpatient PC</b>                                     | ≥ 90% cancer, PCI unknown                              | MDAS ( <i>score</i> ≥7)                                   | PointP = 33.5% on admission                                                                             |
| Fang, 2008 <sup>70</sup>                | Taiwan         | Prospective Cohort   | 228                                                           | <b>Inpatient PCU - Inpatient PC</b>                                                      | ≥ 90% cancer, PCI unknown                              | DSM IV, DRS ( <i>score</i> ≥10), Psychiatry interview     | PeriodP = 46.9% (admission LOS NR)                                                                      |
| Lawlor, 2000 <sup>46</sup>              | Canada         | Prospective Cohort   | 104                                                           | <b>Inpatient PCU - Inpatient PC</b>                                                      | ≥ 90% cancer, PCI included                             | DSM IV                                                    | Inc = 45% (admission LOS NR),<br>PointP = 42.3% on admission,<br>PeriodP 68.3% (admission LOS NR)       |
| Minagawa, 1996 <sup>59</sup>            | Japan          | Cross Sectional      | 93                                                            | <b>Inpatient PCU - Inpatient PC</b>                                                      | ≥ 90% cancer, PCI included                             | DSM III-R, Psychiatry interview                           | PointP = 28% on admission                                                                               |
| Kim, 2015 <sup>65</sup>                 | South Korea    | Prospective Cohort   | 322                                                           | <b>Inpatient PCU - Inpatient PC</b>                                                      | ≥ 90% cancer, PCI unknown                              | DSM IV, DSM V, CAM, DRS-R98 ( <i>score not reported</i> ) | PointP = 30.4% 4-7d post admission                                                                      |
| Mercadante, 2015 <sup>53</sup>          | Italy          | Prospective Cohort   | 166                                                           | <b>Inpatient PCU - Inpatient PC</b>                                                      | ≥ 90% cancer, excluded PCI                             | CAM                                                       | PointP = 66%                                                                                            |

| <u>Reference</u>              | <u>Country</u> | <u>Study Design</u> | <u>Sample Size</u> | <u>Care Setting &amp;<br/>Care Team Assessing<br/>Delirium</u> | <u>Palliative Indicator<br/>Diagnosis</u>              | <u>Diagnostic Tool<br/>(<i>diagnostic<br/>score</i>)</u>   | <u>Epidemiological Data Reported<br/>(assessment period)</u>                                            |
|-------------------------------|----------------|---------------------|--------------------|----------------------------------------------------------------|--------------------------------------------------------|------------------------------------------------------------|---------------------------------------------------------------------------------------------------------|
| Hui, 2015 <sup>72</sup>       | USA & Brazil   | Prospective Cohort  | 352                | <b>Inpatient PCU in Cancer Center - Inpatient PC</b>           | ≥ 90% cancer, PCI unknown                              | MDAS                                                       | PointP = 43% on admission, PeriodP = 70% (median LOS 6d)                                                |
| Tarumi, 2011 <sup>47</sup>    | Canada         | Prospective Cohort  | 958                | <b>General Inpatient – Consultant PC</b>                       | Mixed diagnosis, PCI unknown                           | DSM IV                                                     | PointP = 23.6% on first assessment                                                                      |
| Goy, 2011 <sup>38</sup>       | USA            | Prospective Cohort  | 103                | <b>Community – Consultant PC</b>                               | ≥ 90% males, mixed diagnoses, PCI included             | CAM                                                        | PointP = 44.1% on first assessment, PointP = 42.5% on last assessment, PeriodP = 54.5% (median LOS 81d) |
| Fadul, 2008 <sup>39</sup>     | USA            | Cross Sectional     | 250                | <b>General Inpatients and Outpatients – Consultant PC</b>      | ≥ 90% cancer, PCI unknown                              | DSM IV                                                     | PointP = 28%                                                                                            |
| Stillman, 2000 <sup>40</sup>  | USA            | Cross Sectional     | 31                 | <b>Inpatient PCU in Cancer Center - Inpatient PC</b>           | Mixed diagnoses, PCI unknown                           | CAM                                                        | PointP = 58% on initial assessment                                                                      |
| Fernandez, 1989 <sup>41</sup> | USA            | Cross Sectional     | 206                | <b>General Inpatients - Psychiatry</b>                         | ≥ 90% males, all patients with AIDS, PCI included      | DSM III-R                                                  | PointP = 57% on initial assessment                                                                      |
| Massie, 1983 <sup>42</sup>    | USA            | Prospective Cohort  | 13                 | <b>Inpatient Oncology - Psychiatry</b>                         | ≥ 90% cancer, PCI unknown                              | DSMIII, 58pt rating scale ( <i>not further specified</i> ) | PeriodP = 85% (prior to death)                                                                          |
| Freeman, 2014 <sup>48</sup>   | Canada         | Cross Sectional     | 6769               | <b>Community – Palliative Home Care</b>                        | Mixed diagnoses, PCI unknown                           | Inter RAI-PC                                               | PointP = 12.3% on initial assessment, PeriodP = 58% (prior to death)                                    |
| Miyajima, 2014 <sup>60</sup>  | Japan          | Cross Sectional     | 255                | <b>General Inpatients – Consultant PC</b>                      | ≥ 90% cancer, PCI unknown                              | DSM IV                                                     | PointP = 12.1% on initial assessment                                                                    |
| Godfrey, 2010 <sup>63</sup>   | Ireland        | Prospective Cohort  | 34                 | <b>Inpatient Hospice - Inpatient PC</b>                        | ≥ 90% cancer, PCI unknown                              | DSM IV, DRS-R98, MDAS ( <i>score not reported</i> )        | Inc = 16.5% (28d)<br>PointP = 73.5% on admission                                                        |
| Caraceni, 2000 <sup>54</sup>  | Italy          | Prospective Cohort  | 393                | <b>Inpatient PCU - Inpatient PC</b>                            | ≥ 90% cancer, PCI unknown                              | CAM                                                        | PointP = 27.7% at first assessment                                                                      |
| Lam, 2003 <sup>68</sup>       | Hong Kong      | Prospective Cohort  | 82                 | <b>Inpatient PCU - Inpatient PC</b>                            | ≥ 90% cancer, PCI included                             | DSM IV, MDAS ( <i>severity only, score not reported</i> )  | PointP = 40.2% on admission                                                                             |
| Durkin, 2003 <sup>64</sup>    | Ireland        | Cross Sectional     | 224                | <b>Inpatient Hospice - Inpatient PC</b>                        | Diagnoses not specified for all patients, PCI included | ICD10                                                      | PointP = 19% on admission                                                                               |
| Gaudreau, 2005 <sup>49</sup>  | Canada         | Prospective Cohort  | 261                | <b>General Inpatient – Psycho-Oncology</b>                     | ≥ 90% cancer, PCI included                             | Nu-DESC ( <i>score ≥2</i> )                                | Inc = 16.5% (LOS 28d)                                                                                   |

| <u>Reference</u>                           | <u>Country</u>              | <u>Study Design</u>                  | <u>Sample Size</u>  | <u>Care Setting &amp;<br/>Care Team Assessing<br/>Delirium</u>   | <u>Palliative Indicator<br/>Diagnosis</u>    | <u>Diagnostic Tool<br/>(<i>diagnostic<br/>score</i>)</u> | <u>Epidemiological Data Reported<br/>(assessment period)</u>                |
|--------------------------------------------|-----------------------------|--------------------------------------|---------------------|------------------------------------------------------------------|----------------------------------------------|----------------------------------------------------------|-----------------------------------------------------------------------------|
| <a href="#">Hausner, 2018<sup>50</sup></a> | <a href="#">Canada</a>      | <a href="#">Retrospective Cohort</a> | <a href="#">280</a> | <a href="#">Inpatient PCU in CancerCenter<br/>– Inpatient PC</a> | <a href="#">≥ 90% cancer, PCI unknown</a>    | <a href="#">CAM</a>                                      | <a href="#">PointP = 73% at death,<br/>PeriodP – 10.7% (median LOS 10d)</a> |
| <a href="#">Kang, 2018<sup>66</sup></a>    | <a href="#">South Korea</a> | <a href="#">Prospective Cohort</a>   | <a href="#">102</a> | <a href="#">Inpatient PCU - Inpatient PC</a>                     | <a href="#">&gt;90% cancer, PCI excluded</a> | <a href="#">CAM</a>                                      | <a href="#">Inc = 28.3% (7d),<br/>PointP = 23.5% on admission</a>           |
